# Supplementary material for: Transformation Mechanism of Rare Ginsenosides in American Ginseng by Different Processing Methods and Antitumour Effects
Source: Front Nutr. 2022 Apr 4;9:833859. doi: 10.3389/fnut.2022.833859 (PMC9014012; doi:10.3389/fnut.2022.833859)
Supplement: Supplementary file 1 [file Table_1.XLSX]

## Sheet: Data
FIGURE 5
	tumor weight(g)	Tumor inhibition rate（%）			weight(g)	spleen(g)	Spleen index (mg/g)		White blood cells（109/L)
model	2.16			normal	0.25	40.66	6.14855		normal	model	CTX	CTX+AGS-QL	CTX+AGS-QM	CTX+AGS-QH	CTX+AGS-HL	CTX+AGS-HM	CTX+AGS-HH
	3.2				0.22	41.16	5.345		5.4	6.8	2.7	5.3	5.2	5.5	2.4	5.2	4.9
	2.48				0.21	39.74	5.28435		4.6	6	2.5	3.3	6.2	4.1	6.3	3.8	3.9
	2.85				0.19	40.38	4.7053		3.8	7.1	1	2.3	4.2	5.4	4.7	4.1	4.6
	2.39				0.27	38.65	6.98577		4.7	7.4	1.5	6.1	3.8	3.1	5.4	5.4	6.5
CTX	0.82	68.6544		model	0.23	45.58	5.04607		3.2	7.5	1.8	5.5	4.1	6.6	5.3	4	4.3
	0.66	74.7706			0.21	46.87	4.48048		5.4	8.1	2.4	7.6
	0.86	67.1254			0.16	42.52	3.76294			6.4
	0.68	74.0061			0.31	46.3	6.69546
	0.66	74.7706			0.24	47.18	5.0869
CTX+QL	0.38	85.474		CTX	0.15	40.66	3.68913		IL-2
	0.23	91.208			0.09	41.16	2.18659		normal	model	CTX	CTX+AGS-QL	CTX+AGS-QM	CTX+AGS-QH	CTX+AGS-HL	CTX+AGS-HM	CTX+AGS-HH
	0.98	62.5382			0.12	45.74	2.62352		8.87654	8.01235	7.45679	11.6543	11.284	11.7778	18.5062	21.1605	26.5926
	0.82	68.6544			0.11	40.38	2.72412		9.67901	6.22222	7.45679	11.2222	8.1358	13.9074	18.6914	17.1481	19.4938
	0.72	72.4771			0.11	38.65	2.84605		8.62963	7.76543	5.85185	8.44444	6.09877	12.6111	19.8025	19.679	20.7284
CTX+QM	0.74	71.7125		CTX+QL	0.14	30.35	4.61285		6.71605	5.41975	5.60494	6.03704	5.7284	8.81481	12.5802	15.6049	12.642
	0.22	91.5902			0.16	33.15	4.82655		6.40741	4.98765		4.98765	6.90123	6.40741	10.7284	14.7407	11.5926
	0.61	76.682			0.14	32.92	4.25273		6.96296	6.65432		4.18519	8.87654	8.16667	9.92593	9	7.7037
	0.37	85.8563			0.14	34.8	4.02299		8.38272	7.33333				6.96296	9.18519	8.01235	10.7901
	0.82	68.6544		CTX+QM	0.13	27.57	4.71527								18.4444	8.1358	13.321
CTX+QH	0.48	81.6514			0.14	27.85	5.02693		IL-10
	0.89	65.9786			0.21	34.52	6.08343		normal	model	CTX	CTX+AGS-QL	CTX+AGS-QM	CTX+AGS-QH	CTX+AGS-HL	CTX+AGS-HM	CTX+AGS-HH
	0.21	91.9725			0.2	35.2	5.68182		264.907	247.315	198.241	227.87	205.648	266.759	247.315	261.667	271.389
	0.59	77.4465			0.12	34.41	3.48736		249.167	238.056	186.204	201.018	213.982	225.093	214.907	206.574	249.167
	0.37	85.8563		CTX+QH	0.13	29.22	4.44901		281.574	233.426	179.722	203.796	202.87	234.352	216.759	221.389	228.333
CTX+HL	0.72	72.4771			0.15	31.33	4.78774		244.537	237.13	177.87	201.944	213.056	240.833	217.685	224.167	224.167
	0.66	74.7706			0.12	27.13	4.42315		260.278	238.982	181.574	222.315	226.018	250.093	269.537	220.463	260.278
	0.36	86.2385			0.24	37.23	6.44641		282.5	235.278	210.278	236.204	253.796				272.778
	0.43	83.5627		CTX+HL	0.09	27.84	3.23276
	0.52	80.1223			0.17	29.07	5.84795
CTX+HM	0.18	93.1193			0.18	28.57	6.30032
	0.173	93.3869			0.2	29.95	6.6778
	0.37	85.8563			0.17	27.93	6.08665
	0.43	83.5627		CTX+HM	0.19	34.43	5.51844
	0.62	76.2997			0.14	35.6	3.93258
CTX+HH	0.46	82.4159			0.18	34.05	5.28634
	0.1	96.1774			0.17	32.61	5.21312
	0.41	84.3272			0.2	33.66	5.94177
	0.88	66.3609		CTX+HH	0.16	29.88	5.35475
	0.46	82.4159			0.17	30.92	5.49806
					0.24	37.35	6.4257
					0.19	31.25	6.08
					0.13	27.85	4.66786
FIGURE 6									FIGURE 7
	CD8LR	CD4UL	CD4+/CD8+		LRCD25	ULCD4	CD4+/CD25+		cleaved-cas-3	model	35.628	48.571	50.028		BAX	model	58.561	67.64	70.033
normal	69.1	20.68	29.9276		60.83	1.59	2.61384			CTX	64.128	77.207	79.964			CTX	79.699	85.05	90.163
	66.95	23.72	35.4294		56.9	1.96	3.44464			CTX+AGS-QL	68.457	75.26	64.609			CTX+AGS-QL	76.785	84.45	81.797
	67.57	20.36	30.1317		60.02	2.02	3.36554			CTX+AGS-QM	86.042	73.428	62.571			CTX+AGS-QM	84.72	78.72	89.32
model- S180	21.79	3.91	17.944		14.48	1.8	12.4309			CTX+AGS-QH	84.528	89.546	72.381			CTX+AGS-QH	97.546	98.081	101.786
	15.42	3.1	20.1038		9.21	1.98	21.4984			CTX+AGS-HL	96.186	99.936	111.819			CTX+AGS-HL	83.817	81.17	88.817
	21.79	3.91	17.944		14.48	1.8	12.4309			CTX+AGS-HM	106.586	101.454	113.553			CTX+AGS-HM	93.434	90.099	99.148
CTX	61.49	14.85	24.1503		49.91	10.45	20.9377			CTX+AGS-HH	138.019	124.403	117.857			CTX+AGS-HH	97.837	105.638	109.64
	55.14	15.2	27.5662		23.06	2.03	8.80312		BCL-2	model	99.588	115.18	110.863		GAPDH	model	127.439	124.158	118.429
	51.33	14.26	27.781		15.14	2.02	13.3421			CTX	88.51	74.109	79.121			CTX	141.841	137.796	133.595
CTX+AGS-QL	66.87	17.09	25.5571		59.19	2.56	4.32505			CTX+AGS-QL	59.275	73.534	53.473			CTX+AGS-QL	123.645	118.862	114.224
	66.47	17.44	26.2374		56.52	2.44	4.31706			CTX+AGS-QM	58.795	68.795	55.993			CTX+AGS-QM	122	118.903	113.566
	70.81	17.67	24.9541		61.01	1.33	2.17997			CTX+AGS-QH	53.844	62.265	65.552			CTX+AGS-QH	135.116	131.617	126.148
CTX+AGS-QM	66.33	17.98	27.1069		57.9	3.27	5.64767			CTX+AGS-HL	43.027	50.465	54.182			CTX+AGS-HL	122.809	118.826	114.495
	71.35	22.38	31.3665		58.05	1.4	2.41171			CTX+AGS-HM	54.496	54.88	41.564			CTX+AGS-HM	125.778	120.546	122.51
	67.3	18.48	27.4591		58.1	2.2	3.78657			CTX+AGS-HH	39.893	30.905	44.875			CTX+AGS-HH	132.217	127.622	123.966
CTX+AGS-QH	67.03	19.82	29.5688		59.29	1.49	2.51307
	69.1	19.69	28.4949		60.91	1.6	2.62683
	71.51	21.15	29.5763		51.91	2.76	5.31689
CTX+AGS-HL	66.6	21.6	32.4324		55.73	3.41	6.11879
	67.27	18.3	27.2038		58.45	2.73	4.67066
	71.45	19.98	27.9636		65.18	1.47	2.25529
CTX+AGS-HM	65.23	23.35	35.7964		57.68	1.88	3.25936
	68.1	22.02	32.3348		59.28	3.17	5.3475
	64.1	23.59	36.8019		54.48	3.07	5.6351
CTX+AGS-HH	62.92	25.9	41.1634		55.82	2.01	3.60086
	61.07	25.1	41.1004		54.04	2.52	4.66321
	73.37	18.91	25.7735		69.38	1.17	1.68636
FIGURE 8
	tumor weight(g)	Tumor inhibition rate（%）			spleen	weight(g)	Spleen index (mg/g)			White blood cells（109/L)		IL-2
model	2.16			normal	0.18	36.69	4.90597		normal	2.6		normal	model	CTX	AGS-HL	AGS-HH	CTX/2+AGS-HL	CTX/2+AGS-HH
	3.2				0.19	37.43	5.07614			3.8		23	12.44	17.04	19.9753	24.42	16.59	19.48
	2.48				0.15	40.37	3.71563			4.7		17.75	15.53	16.91	16.8889	23.56	18.37	18.12
	2.85				0.21	38.77	5.41656			3.2		19.36	10.84	14.91	15.4074	23.93	17.75	21.58
	2.39				0.2	39.66	5.04286			5.4		17.26	13.31	13.07	15.037	19.11	12.69	20.1
CTX（25mg/kg)	0.82	68.7023		model	0.18	46.87	3.84041		model	6.8		16.77	14.67		15.7778	18.74	16.63	17.14
	0.66	74.8092			0.16	42.52	3.76294			7.1					18.5556	20.1
	0.86	67.1756			0.21	46.3	4.53564			7.4						25.284
	0.68	74.0458			0.14	47.18	2.96736			7.5
	0.66	74.8092		CTX（25mg/kg)	0.15	40.66	3.68913			8.4
AGS-HL	1.59	39.313			0.09	41.16	2.18659			6.4
	1.39	46.9466			0.12	45.74	2.62352		CTX（25mg/kg)	2.7		IL-10
	1.62	38.1679			0.11	40.38	2.72412			2.5		normal	model	CTX	AGS-HL	AGS-HH	CTX/2+AGS-HL	CTX/2+AGS-HH
	1.69	35.4962			0.11	38.65	2.84605			1		282.5	231.111	198.241	250.093	314.445	232.5	245.463
	1.55	40.8397		AGS-HL	0.17	45.4	3.74449			1.5		258.889	233.426	186.204	235.278	297.778	238.056	240.833
AGS-HH	0.94	64.1221			0.21	42.12	4.98575			1.8		273	237.13	179.722	250.093	283.889	263.055	217.685
	1.23	53.0534			0.14	42.5	3.29412			2.4		281.574	211.204	177.87	237.13	307.5	250.556	233.426
	0.98	62.5954			0.21	40.67	5.16351		AGS-HL	4.7		260.278	218.611	181.574	238.982	293.611	232.5	254.722
	1.19	54.5802			0.15	32.72	4.58435			4.4		288.055	238.056
	1.34	48.855		AGS-HH	0.23	38.15	6.02883			5.9
CTX/2+AGS-HL	0.93	64.5038			0.16	38.75	4.12903			4
	1.35	48.4733			0.16	37.62	4.25306			5.7
	1.07	59.1603			0.21	39.25	5.35032		AGS-HH	4.3
	0.82	68.7023			0.17	44.71	3.80228			3.9
	1.37	47.7099		CTX/2+AGS-HL	0.13	40.06	3.24513			3.2
CTX/2+AGS-HH	0.81	69.084			0.19	35.62	5.33408			3.5
	0.65	75.1908			0.17	42.2	4.02844			4.2
	0.98	62.5954			0.12	35.62	3.36889		CTX/2+AGS-HL	6.6
	0.76	70.9924			0.17	33.93	5.01032			4.7
	0.75	71.374		CTX/2+AGS-HH	0.16	32.26	4.9597			6.3
					0.19	38.17	4.97773			5.9
					0.15	38.34	3.91236			3.5
					0.14	37.19	3.76445			5.2
					0.16	35.03	4.56751		CTX/2+AGS-HH	2.1
										5.3
										3.6
										2.9
										3.9
										3.6
										3.3
FIGURE 9
	CD8LR	CD4UL	CD4+/CD8+		LRCD25	ULCD4	CD4+/CD25+
normal	69.1	20.68	29.9276		60.83	1.59	2.61384
	66.95	23.72	35.4294		56.9	1.96	3.44464
	67.57	20.36	30.1317		60.02	2.02	3.36554
model	21.79	3.91	17.944		14.48	1.8	12.4309
	15.42	3.1	20.1038		9.21	1.98	21.4984
	21.79	3.91	17.944		14.48	1.8	12.4309
CTX（25mg/kg)	61.49	14.85	24.1503		49.91	10.45	20.9377
	26.19	5.74	21.9168		23.06	2.03	19.1189
	27.96	4.85	17.3462		15.14	2.02	16.8917
AGS-HL	70.98	16.45	23.1755		59.61	3.45	5.78762
	65.57	18.79	28.6564		56.3	3.48	6.18117
	63.97	20.77	32.4683		53.92	3.69	6.84347
AGS-HH	65.56	21.82	33.2825		57.92	2.85	4.92058
	65.23	20.84	31.9485		56.39	2.48	4.39794
	67.63	17.38	25.6987		57.91	2.83	4.88689
CTX/2+AGS-HL	67.59	18.12	26.8087		56.88	2.61	4.58861
	68.94	17.44	25.2974		57.79	3.52	6.09102
	65.31	18.71	28.648		54.88	4.43	8.07216
CTX/2+AGS-HH	67.65	21	31.0421		58.5	2.9	4.95726
	66.53	22.2	33.3684		56.07	3.22	5.74282
	67.57	18.05	26.713		57.54	3.26	5.66562
FIGURE10		N1	N2	N3
cleaved-cas-3	model	96.536	107.05	101.26	GAPDH	model	148.18	148.27	142.574
	CTX	143.449	131.6	144.58		CTX	143.26	146.34	141.755
	HL	109.445	114.329	111.74		HL	143.03	148.42	141.564
	HH	127.218	123.577	125.15		HH	139.88	137.22	134.425
	CTX/2+HL	118.857	117.61	117.38		CTX/2+HL	137.22	133.41	131.229
	CTX/2+HM	159.291	146.66	141.27		CTX/2+HM	142.53	141.92	136.29
BAX	model	86.854	78.743	77.52	BCL-2	model	173.507	187.04	183.085	GAPDH	model	149.491	148.67	146.874
	CTX	98.031	99.348	101.52		CTX	161.706	168.705	167.27		CTX	162.741	155.88	159.066
	HL	113.136	126.11	110.048		HL	122.704	127.27	118.653		HL	180.661	171.37	177.639
	HH	113.434	109.981	115.15		HH	131.157	128.34	127.96		HH	167.517	172.317	169.474
	CTX/2+HL	125.353	131.04	136.66		CTX/2+HL	141.639	148.47	136.11		CTX/2+HL	170.133	179.77	175.033
	CTX/2+HM	119.555	118.34	117.96		CTX/2+HM	157.449	151.87	167.77		CTX/2+HM	183.596	187.16	178.21
